# Supplementary material
Source: MDPI journal article supplement (https://www.mdpi.com/2311-7524/9/2/169)
Supplement: s1 [file s1]

**Table S1.** Experimental design for arranging the treatments in saffron (a=PGRs, b=light spectra).

| Rep. 1 |                     |      | Rep. 2 |                     |      | Rep. 3 |                     |      |
|--------|---------------------|------|--------|---------------------|------|--------|---------------------|------|
| a1b1   | Aluminum Foil Panel | a1b2 | a2b1   | Aluminum Foil Panel | a2b2 | a3b1   | Aluminum Foil Panel | a3b2 |
|        |                     |      |        |                     |      |        |                     |      |
| a1b3   |                     | a1b4 | a2b3   |                     | a2b4 | a3b3   |                     | a3b4 |
|        |                     |      |        |                     |      |        |                     |      |
| a2b1   |                     | a2b2 | a3b1   |                     | a3b2 | a1b1   |                     | a1b2 |
|        |                     |      |        |                     |      |        |                     |      |
| a2b3   |                     | a2b4 | a3b3   |                     | a3b4 | a1b3   |                     | a1b4 |
|        |                     |      |        |                     |      |        |                     |      |
| a3b1   |                     | a3b2 | a1b1   |                     | a1b2 | a2b1   |                     | a2b2 |
|        |                     |      |        |                     |      |        |                     |      |
| a3b3   |                     | a3b4 | a1b3   |                     | a1b4 | a2b3   |                     | a2b4 |

In phytotron, rooms are separated horizontally using metal sheets.
